# Supplementary material for: Theoretical studies on interactions between low energy electrons and protein–DNA fragments: valence anions of AT-amino acids side chain complexes
Source: Royal Society of Chemistry journal article supplement (doi:10.1039/c1cp21511f), 2011-01-01

## Supplementary Information

### Theoretical studies on interactions between low energy electrons and protein-DNA fragments: Valence anions of AT-Amino Acids Side Chain Complexes.

Anna Szyperska,<sup>a</sup> Agnieszka Gajewicz,<sup>a</sup> Kamil Mazurkiewicz,<sup>a</sup> Jerzy Leszczynski,<sup>\*b</sup>

Janusz Rak<sup>\*a</sup>

<sup>a</sup> Department of Chemistry, University of Gdańsk, Sobieskiego 18, 80-952 Gdańsk, Poland. E-mail: [janusz@raptor.chem.univ.gda.pl](mailto:janusz@raptor.chem.univ.gda.pl); Fax: (+4858) 523 5571; Tel.: (+4858) 523 5322

<sup>b</sup> Interdisciplinary Center for Nanotoxicity, Department of Chemistry, Jackson State University, Jackson, MS 39217, USA. E-mail: [jerzy@icnanotox.org](mailto:jerzy@icnanotox.org); Fax: (+01601) 979 6865; Tel.: (+01601) 979 3723

<sup>†</sup>Electronic supplementary information (ESI) available.

**Table S1.** Thermodynamic characteristics of neutral 9-methyladenine...1-methylthymine - acetamide in reversed WC, Hoogsteen and reversed Hoogsteen configurations.  $\Delta E$ ,  $E_{\text{stab}}$ ,  $\Delta G$  and  $G_{\text{stab}}$  stand for the relative energy, stabilization energy, relative Gibbs free energy and stabilization free energy, respectively.  $\Delta E$  and  $\Delta G$  were calculated with respect to the most stable neutral complex,  $WC_{\text{ACAM\_A-N7,N10H}}$ . The values were calculated at the B3LYP/6-31++G(d,p) level. All energies in kcal/mol.

| Structure                                                | $\Delta E$ | $E_{\text{stab}}$ | $\Delta G$ | $G_{\text{stab}}$ |
|----------------------------------------------------------|------------|-------------------|------------|-------------------|
| <b>reversed Watson-Crick</b>                             |            |                   |            |                   |
| revWC <sub>ACAM_A-N7,N10H</sub>                          | 0.28       | -10.19            | -0.03      | 2.32              |
| revWC <sub>ACAM_A-N3,CH<sub>3</sub></sub>                | 2.30       | -8.17             | 1.92       | 4.27              |
| revWC <sub>ACAM_A-N7,C8H</sub>                           | 2.53       | -7.93             | 1.24       | 3.59              |
| revWC <sub>ACAM_T-O7,CH<sub>3</sub></sub>                | 3.41       | -7.06             | 1.59       | 3.94              |
| revWC <sub>ACAM_T-O8,CH<sub>3</sub></sub> <sup>(a)</sup> | 3.56       | -6.90             | 3.26       | 5.61              |
| revWC <sub>ACAM_T-O7_A-C2H</sub>                         | 6.06       | -4.41             | 3.89       | 6.24              |
| revWC <sub>ACAM_A-N3,C2H</sub>                           | 6.94       | -3.53             | 2.95       | 5.30              |
| <b>Hoogsteen</b>                                         |            |                   |            |                   |
| Hoog <sub>ACAM_A-N1,N10H</sub>                           | -1.36      | -10.44            | -0.91      | 2.49              |
| Hoog <sub>ACAM_T-O7_A-C8H</sub>                          | 0.35       | -8.73             | 0.65       | 4.06              |
| Hoog <sub>ACAM_A-N3,CH<sub>3</sub></sub>                 | 1.35       | -7.73             | 1.32       | 4.72              |
| Hoog <sub>ACAM_T-O7,CH<sub>3</sub></sub>                 | 1.87       | -7.21             | 1.23       | 4.63              |
| Hoog <sub>ACAM_T-O8_A-N10H</sub>                         | 2.40       | -6.69             | 1.86       | 5.26              |
| Hoog <sub>ACAM_T-O8,CH<sub>3</sub></sub>                 | 3.02       | -6.07             | 2.25       | 5.65              |
| Hoog <sub>ACAM_A-N1,C2H</sub>                            | 3.37       | -5.71             | 1.94       | 5.34              |
| Hoog <sub>ACAM_A-N3,C2H</sub>                            | 4.03       | -5.05             | 2.43       | 5.83              |
| <b>reversed Hoogsteen</b>                                |            |                   |            |                   |
| revHoog <sub>ACAM_A-N1,N10H</sub>                        | -1.42      | -10.79            | -1.03      | 2.03              |
| revHoog <sub>ACAM_T-O7_A-C8H</sub>                       | -0.29      | -9.66             | 0.12       | 3.18              |
| revHoog <sub>ACAM_A-N3,CH<sub>3</sub></sub>              | 1.74       | -7.62             | 1.55       | 4.61              |
| revHoog <sub>ACAM_T-O8,CH<sub>3</sub></sub>              | 2.13       | -7.23             | 1.52       | 4.58              |
| revHoog <sub>ACAM_T-O7,CH<sub>3</sub></sub>              | 3.02       | -6.34             | 1.66       | 4.72              |
| revHoog <sub>ACAM_T-O8_A-N10H</sub>                      | 3.61       | -5.75             | 2.78       | 5.84              |
| revHoog <sub>ACAM_A-N1,C2H</sub>                         | 3.75       | -5.62             | 2.57       | 5.63              |
| revHoog <sub>ACAM_A-N3,C2H</sub>                         | 4.26       | -5.10             | 2.94       | 6.00              |

<sup>(a)</sup> revWC<sub>ACAM</sub>\_T-O8\_A-N10H converged to revWC<sub>ACAM</sub>\_T-O8,CH<sub>3</sub> structure

**Fig. S1** Optimized structures of the neutral complexes of MAMT-ACAM complex in (A) reversed Watson-Crick, (B) Hoogsteen, (C) reversed Hoogsteen configurations.

**(A)**

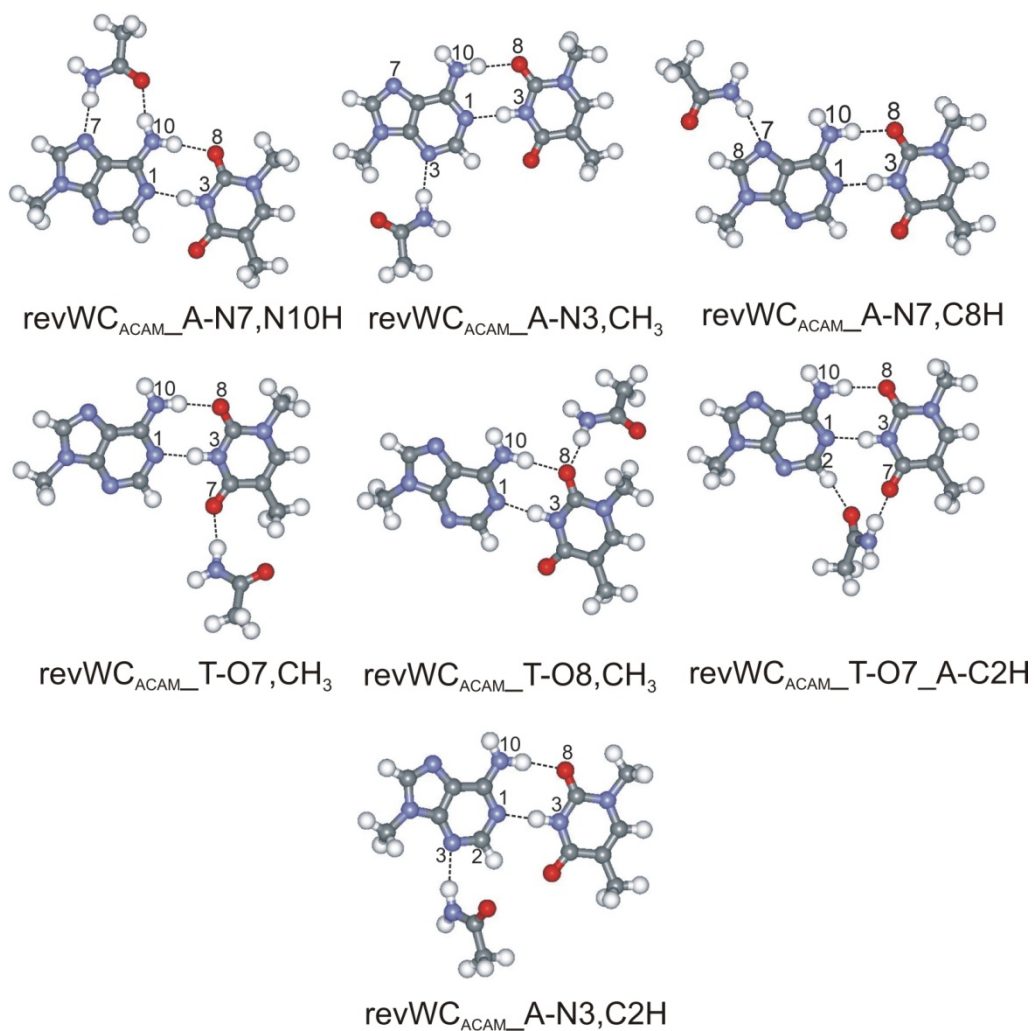

(B)

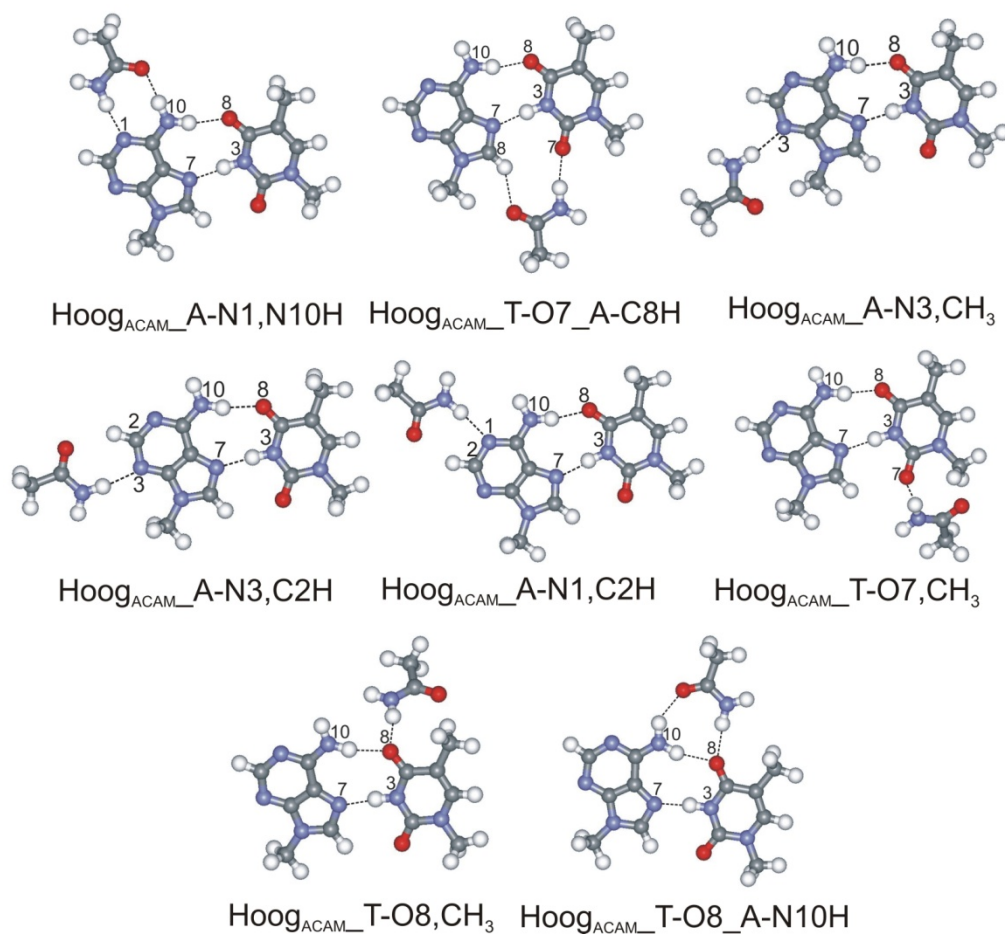

(C)

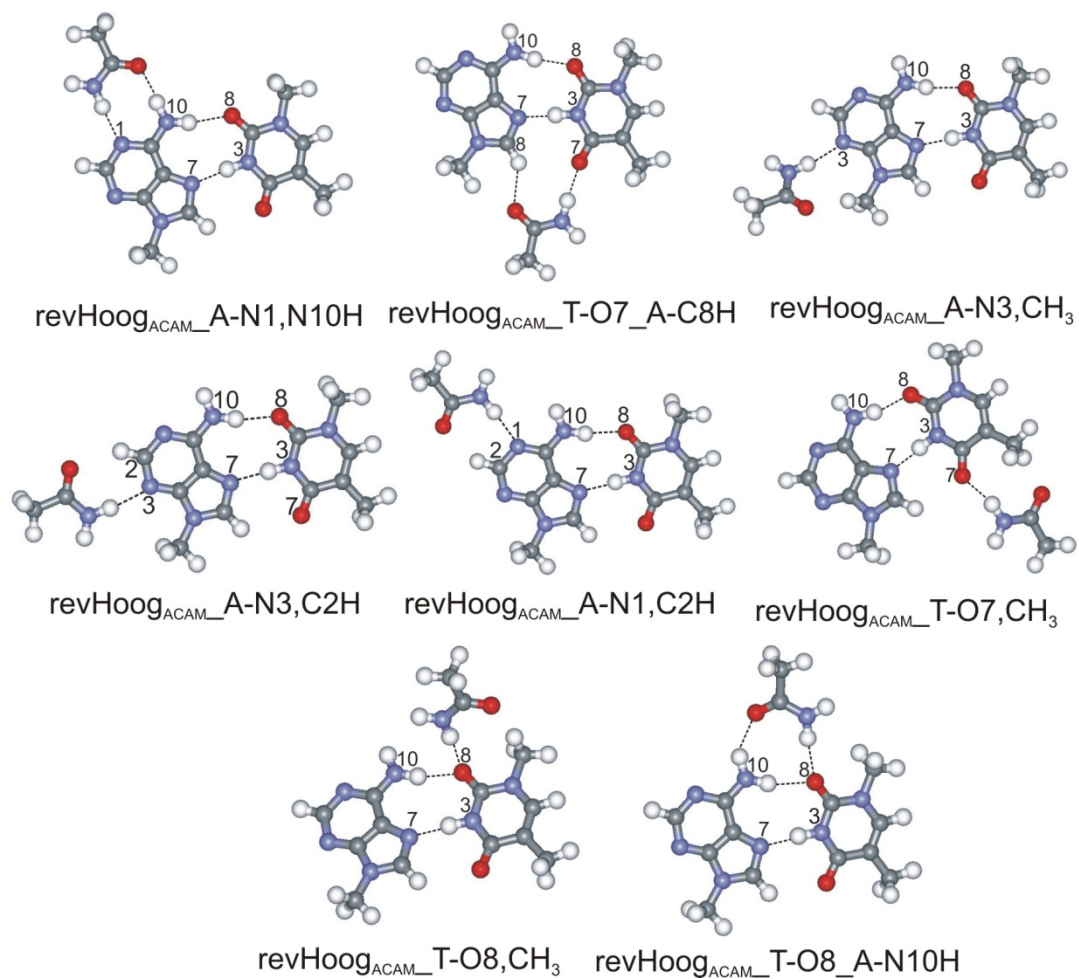

Supplement: c1cp21511f.pdf [file c1cp21511f.pdf]
